# Supplementary material for: High thermal radiation of Ca-doped lanthanum chromite
Source: Royal Society of Chemistry journal article supplement (doi:10.1039/c4ra16319b), 2015-01-01
Supplement: c4ra16319b1.pdf [file c4ra16319b1.pdf]

Supplementary Information

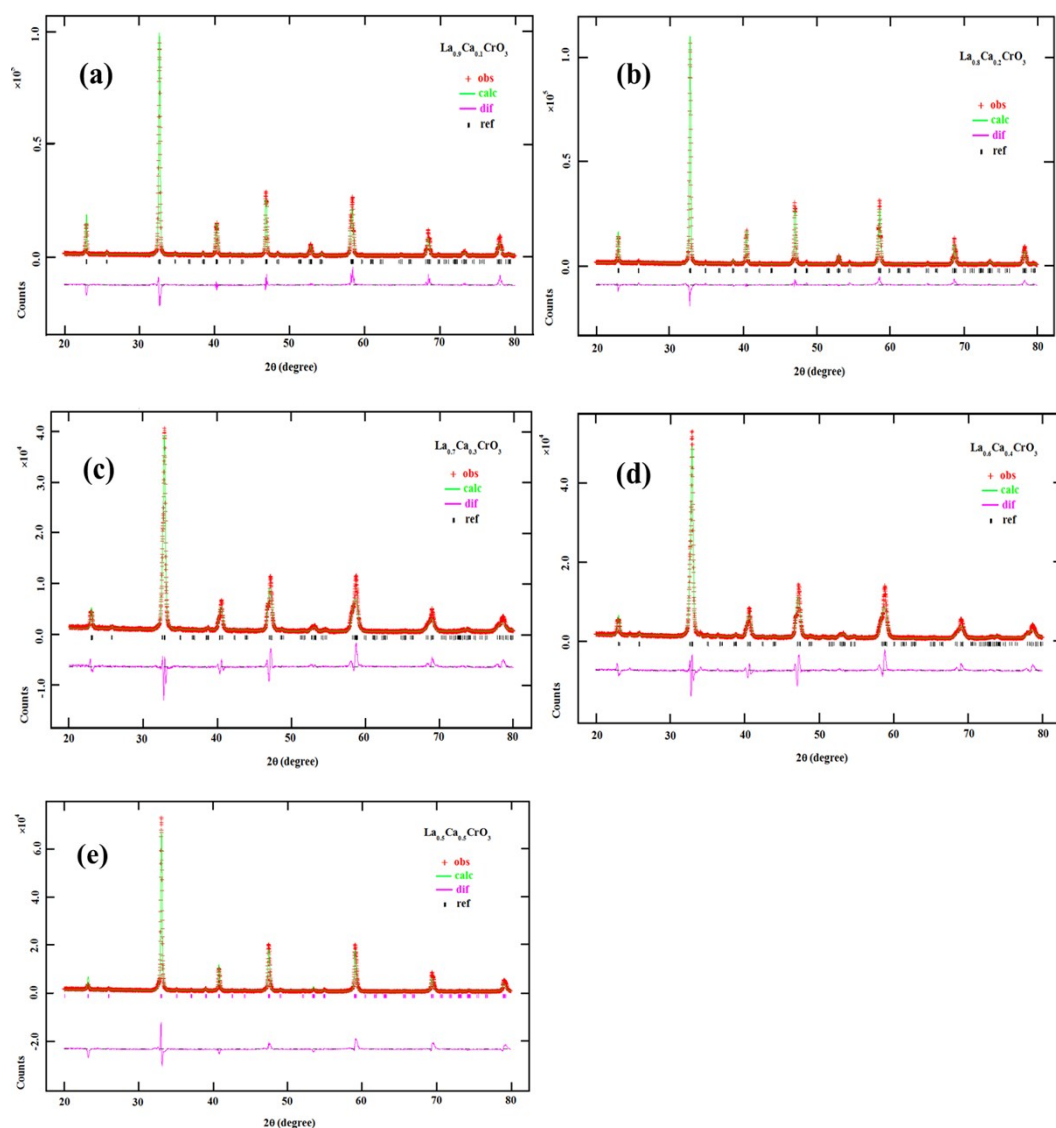

**Fig.S1** Rietveld refinements (line) of the observed XRD patterns (+) for (a) $\text{La}_{0.9}\text{Ca}_{0.1}\text{CrO}_3$ ; (b) $\text{La}_{0.8}\text{Ca}_{0.2}\text{CrO}_3$ ; (a) $\text{La}_{0.7}\text{Ca}_{0.3}\text{CrO}_3$ ; (a) $\text{La}_{0.69}\text{Ca}_{0.4}\text{CrO}_3$ ; (a) $\text{La}_{0.5}\text{Ca}_{0.5}\text{CrO}_3$ . Vertical bars below the patterns show the position of all possible reflection peaks of their phases. The lowest curve is the difference between the observed and the calculated intensities.

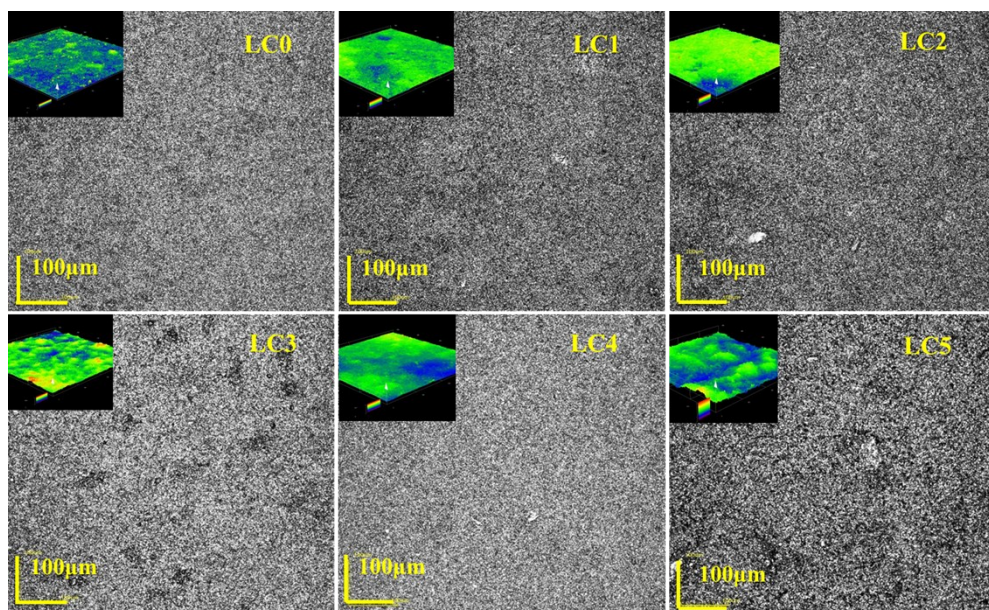

**Fig.S2** Micrographs and surface roughness statistical graphs of  $\text{La}_{1-x}\text{Ca}_x\text{CrO}_3$  ( $0 \leq x \leq 0.5$ )
